# Supplementary material
Source: PubMed Central journal article supplement (PMC1458925)
Supplement: pnas_0509685103_1.pdf [file pnas_0509685103_1.pdf]

**Table 1. Male approaches to two female types**

| <b>Males</b>              | <b>No. of approaches to:</b> |                              |
|---------------------------|------------------------------|------------------------------|
|                           | <i>H. cydno</i><br>female    | <i>H. pachinus</i><br>female |
| <i>H. cydno galanthus</i> |                              |                              |
| G01                       | 2                            | 0                            |
| G02                       | 2                            | 0                            |
| G03                       | 1                            | 0                            |
| G04                       | 1                            | 0                            |
| G05                       | 4                            | 0                            |
| G06                       | 2                            | 0                            |
| G07                       | 1                            | 0                            |
| G08                       | 1                            | 0                            |
| G09                       | 2                            | 0                            |
| G10                       | 6                            | 0                            |
| G11                       | 5                            | 0                            |
| G12                       | 3                            | 0                            |
| G13                       | 3                            | 0                            |
| G14                       | 1                            | 1                            |
| G15                       | 1                            | 0                            |
| G16                       | 2                            | 0                            |
| G17                       | 3                            | 0                            |
| G18                       | 1                            | 0                            |
| G19                       | 1                            | 0                            |
| G20                       | 1                            | 0                            |
| G21                       | 4                            | 0                            |
| G22                       | 3                            | 0                            |
| G23                       | 1                            | 0                            |
| G24                       | 1                            | 0                            |
| G25                       | 2                            | 0                            |
| G26                       | 1                            | 0                            |
| G27                       | 1                            | 0                            |
| G28                       | 2                            | 0                            |
| G29                       | 1                            | 0                            |
| G30                       | 3                            | 0                            |

| Males              | No. of approaches to:     |                              |
|--------------------|---------------------------|------------------------------|
|                    | <i>H. cydno</i><br>female | <i>H. pachinus</i><br>female |
| G31                | 2                         | 0                            |
| G32                | 1                         | 0                            |
| G33                | 1                         | 0                            |
| G34                | 2                         | 0                            |
| G35                | 2                         | 0                            |
| G36                | 1                         | 0                            |
| G37                | 1                         | 0                            |
| G38                | 2                         | 0                            |
| G39                | 3                         | 0                            |
| G40                | 3                         | 0                            |
| G41                | 1                         | 0                            |
| G42                | 2                         | 0                            |
| G43                | 1                         | 0                            |
| G44                | 2                         | 0                            |
| G45                | 1                         | 0                            |
| <b>Total</b>       | <b>87</b>                 | <b>1</b>                     |
| <i>H. pachinus</i> |                           |                              |
| P01                | 0                         | 1                            |
| P02                | 0                         | 1                            |
| P03                | 0                         | 3                            |
| P04                | 0                         | 2                            |
| P05                | 0                         | 1                            |
| P06                | 0                         | 1                            |
| P07                | 0                         | 2                            |
| P08                | 0                         | 3                            |
| P09                | 0                         | 1                            |
| P10                | 0                         | 1                            |
| P11                | 0                         | 2                            |
| P12                | 0                         | 4                            |
| P13                | 0                         | 1                            |
| P14                | 0                         | 1                            |
| P15                | 0                         | 1                            |

| Males        | No. of approaches to:     |                              |
|--------------|---------------------------|------------------------------|
|              | <i>H. cydno</i><br>female | <i>H. pachinus</i><br>female |
| P16          | 0                         | 1                            |
| P17          | 0                         | 1                            |
| P18          | 0                         | 1                            |
| P19          | 0                         | 1                            |
| P20          | 0                         | 1                            |
| P21          | 0                         | 13                           |
| P22          | 0                         | 4                            |
| P23          | 0                         | 1                            |
| P24          | 0                         | 1                            |
| P25          | 0                         | 3                            |
| <b>Total</b> | <b>0</b>                  | <b>52</b>                    |
