# Supplementary material
Source: PubMed Central journal article supplement (PMC1458925)
Supplement: pnas_0509685103_2.pdf [file pnas_0509685103_2.pdf]

**Table 2. Male approaches to four female types**

| Males                     | No. of approaches to: |                     |                        |                       |
|---------------------------|-----------------------|---------------------|------------------------|-----------------------|
|                           | <i>White cydno</i>    | <i>Yellow cydno</i> | <i>Yellow pachinus</i> | <i>White pachinus</i> |
| <i>H. cydno galanthus</i> |                       |                     |                        |                       |
| G46                       | 1                     | 0                   | 0                      | 1                     |
| G47                       | 2                     | 0                   | 0                      | 0                     |
| G48                       | 1                     | 0                   | 0                      | 3                     |
| G49                       | 1                     | 0                   | 0                      | 0                     |
| G50                       | 3                     | 0                   | 0                      | 1                     |
| G51                       | 1                     | 0                   | 0                      | 1                     |
| G52                       | 2                     | 0                   | 0                      | 1                     |
| G53                       | 1                     | 1                   | 0                      | 0                     |
| G54                       | 1                     | 0                   | 0                      | 1                     |
| G55                       | 0                     | 0                   | 0                      | 2                     |
| G56                       | 2                     | 0                   | 0                      | 1                     |
| G57                       | 1                     | 0                   | 0                      | 0                     |
| G58                       | 2                     | 0                   | 0                      | 0                     |
| G59                       | 1                     | 0                   | 0                      | 2                     |
| G60                       | 1                     | 0                   | 0                      | 1                     |
| G61                       | 3                     | 1                   | 0                      | 1                     |
| G62                       | 3                     | 0                   | 0                      | 0                     |
| G63                       | 1                     | 0                   | 0                      | 0                     |
| G64                       | 1                     | 0                   | 0                      | 1                     |
| G65                       | 1                     | 0                   | 0                      | 0                     |
| G66                       | 2                     | 0                   | 0                      | 0                     |
| G67                       | 1                     | 1                   | 0                      | 2                     |
| G68                       | 1                     | 0                   | 0                      | 2                     |
| G69                       | 1                     | 0                   | 0                      | 0                     |
| G70                       | 2                     | 0                   | 0                      | 1                     |
| G71                       | 0                     | 0                   | 0                      | 1                     |
| G72                       | 0                     | 0                   | 0                      | 2                     |
| G73                       | 0                     | 0                   | 0                      | 1                     |
| G74                       | 0                     | 0                   | 0                      | 3                     |
| G75                       | 0                     | 0                   | 0                      | 1                     |

| Males                     | No. of approaches to: |                     |                        |                       |
|---------------------------|-----------------------|---------------------|------------------------|-----------------------|
|                           | White <i>cydno</i>    | Yellow <i>cydno</i> | Yellow <i>pachinus</i> | White <i>pachinus</i> |
| G76                       | 3                     | 0                   | 0                      | 0                     |
| G77                       | 1                     | 0                   | 0                      | 2                     |
| G78                       | 1                     | 0                   | 0                      | 2                     |
| G79                       | 3                     | 0                   | 0                      | 0                     |
| G80                       | 1                     | 0                   | 0                      | 1                     |
| G81                       | 1                     | 0                   | 0                      | 2                     |
| G82                       | 1                     | 0                   | 0                      | 1                     |
| G83                       | 1                     | 0                   | 0                      | 0                     |
| G84                       | 0                     | 0                   | 0                      | 1                     |
| G85                       | 0                     | 0                   | 0                      | 1                     |
| <b>Total</b>              | <b>48</b>             | <b>3</b>            | <b>0</b>               | <b>39</b>             |
| <b><i>H. pachinus</i></b> |                       |                     |                        |                       |
| P26                       | 0                     | 1                   | 0                      | 0                     |
| P27                       | 0                     | 1                   | 1                      | 0                     |
| P28                       | 0                     | 3                   | 0                      | 0                     |
| P29                       | 0                     | 1                   | 1                      | 0                     |
| P30                       | 0                     | 1                   | 0                      | 0                     |
| P31                       | 0                     | 2                   | 0                      | 0                     |
| P32                       | 0                     | 1                   | 2                      | 0                     |
| P33                       | 0                     | 1                   | 0                      | 0                     |
| P34                       | 0                     | 1                   | 0                      | 1                     |
| P35                       | 0                     | 1                   | 1                      | 0                     |
| P36                       | 0                     | 1                   | 1                      | 0                     |
| P37                       | 0                     | 0                   | 1                      | 0                     |
| P38                       | 0                     | 0                   | 3                      | 1                     |
| P39                       | 0                     | 0                   | 1                      | 0                     |
| P40                       | 0                     | 0                   | 2                      | 0                     |
| P41                       | 0                     | 0                   | 1                      | 0                     |
| P42                       | 0                     | 0                   | 1                      | 0                     |
| P43                       | 0                     | 0                   | 2                      | 0                     |
| P44                       | 0                     | 0                   | 1                      | 0                     |
| P45                       | 0                     | 0                   | 0                      | 1                     |
| P46                       | 0                     | 1                   | 1                      | 0                     |

| <b>Males</b> | <b>No. of approaches to:</b> |                            |                               |                              |
|--------------|------------------------------|----------------------------|-------------------------------|------------------------------|
|              | <b>White <i>cydno</i></b>    | <b>Yellow <i>cydno</i></b> | <b>Yellow <i>pachinus</i></b> | <b>White <i>pachinus</i></b> |
| P47          | 0                            | 2                          | 1                             | 0                            |
| P48          | 0                            | 0                          | 2                             | 0                            |
| P49          | 0                            | 0                          | 2                             | 0                            |
| P50          | 0                            | 0                          | 1                             | 0                            |
| <b>Total</b> | <b>0</b>                     | <b>17</b>                  | <b>25</b>                     | <b>3</b>                     |
