# Supplementary material
Source: PubMed Central journal article supplement (PMC1458925)
Supplement: pnas_0509685103_3.pdf [file pnas_0509685103_3.pdf]

**Table 3. *H. cydno galanthus*/*H. pachinus* mating experiment results**

| <b>Day</b> | <b><i>H. cydno</i><br/>males</b> | <b>Unmodified <i>H.</i><br/><i>pachinus</i> females<br/>(yellow)</b> | <b>Modified <i>H.</i><br/><i>pachinus</i> females<br/>(white)</b> | <b>No. of matings (type)</b>                  |
|------------|----------------------------------|----------------------------------------------------------------------|-------------------------------------------------------------------|-----------------------------------------------|
| 1          | 7                                | 2                                                                    | 2                                                                 | 1 ( <i>cydno</i> ♂ × white <i>pachinus</i> ♀) |
| 2          | 7                                | 2                                                                    | 1                                                                 | 1 ( <i>cydno</i> ♂ × white <i>pachinus</i> ♀) |
| 3          | 7                                | 2                                                                    | 2                                                                 | 0                                             |
| 4          | 10                               | 5                                                                    | 4                                                                 | 0                                             |
| 5          | 10                               | 1                                                                    | 3                                                                 | 2 ( <i>cydno</i> ♂ × white <i>pachinus</i> ♀) |
| 6          | 8                                | 2                                                                    | 2                                                                 | 0                                             |
| 7          | 7                                | 1                                                                    | 1                                                                 | 1 ( <i>cydno</i> ♂ × white <i>pachinus</i> ♀) |

$$P = 1/2 \text{ (day 1)} \times 1/3 \text{ (day 2)} \times 3/4 \text{ (day 5 mating 1)} \times 2/3 \text{ (day 5 mating 2)} \times 1/2 \text{ (day 7)}$$

$$= 0.0417.$$
