# Supplementary material
Source: PubMed Central journal article supplement (PMC1458925)
Supplement: pnas_0509685103_4.pdf [file pnas_0509685103_4.pdf]

**Table 4. Male approaches to three female types**

| Males                     | No. of approaches to:  |                       |                           |
|---------------------------|------------------------|-----------------------|---------------------------|
|                           | <i>H. cydno</i> female | F <sub>1</sub> female | <i>H. pachinus</i> female |
| <i>H. cydno galanthus</i> |                        |                       |                           |
| G86                       | 1                      | 2                     | 0                         |
| G87                       | 3                      | 0                     | 1                         |
| G88                       | 1                      | 1                     | 1                         |
| G89                       | 2                      | 1                     | 1                         |
| G90                       | 1                      | 0                     | 0                         |
| G91                       | 1                      | 0                     | 0                         |
| G92                       | 3                      | 0                     | 1                         |
| G93                       | 1                      | 1                     | 0                         |
| G94                       | 2                      | 0                     | 0                         |
| G95                       | 1                      | 2                     | 0                         |
| G96                       | 0                      | 3                     | 1                         |
| G97                       | 0                      | 1                     | 0                         |
| G98                       | 0                      | 1                     | 0                         |
| G99                       | 0                      | 1                     | 0                         |
| G100                      | 0                      | 0                     | 1                         |
| G101                      | 0                      | 0                     | 1                         |
| G102                      | 1                      | 1                     | 0                         |
| G103                      | 1                      | 0                     | 0                         |
| G104                      | 1                      | 1                     | 0                         |
| G105                      | 1                      | 1                     | 0                         |
| G106                      | 2                      | 2                     | 0                         |
| G107                      | 1                      | 1                     | 0                         |
| G108                      | 0                      | 2                     | 0                         |
| G109                      | 0                      | 1                     | 0                         |
| G110                      | 0                      | 2                     | 1                         |
| G111                      | 0                      | 1                     | 0                         |
| G112                      | 0                      | 1                     | 0                         |
| <b>Total</b>              | <b>23</b>              | <b>26</b>             | <b>8</b>                  |
| <i>H. pachinus</i> males  |                        |                       |                           |
| P51                       | 0                      | 0                     | 1                         |
| P52                       | 0                      | 0                     | 2                         |

| Males        | No. of approaches to:  |                       |                           |
|--------------|------------------------|-----------------------|---------------------------|
|              | <i>H. cydno</i> female | F <sub>1</sub> female | <i>H. pachinus</i> female |
| P53          | 0                      | 1                     | 2                         |
| P54          | 0                      | 0                     | 1                         |
| P55          | 0                      | 0                     | 1                         |
| P56          | 0                      | 0                     | 2                         |
| P57          | 0                      | 0                     | 1                         |
| P58          | 0                      | 0                     | 1                         |
| P59          | 0                      | 0                     | 1                         |
| P60          | 0                      | 0                     | 1                         |
| P61          | 0                      | 0                     | 1                         |
| P62          | 0                      | 0                     | 1                         |
| P63          | 0                      | 0                     | 1                         |
| P64          | 0                      | 0                     | 1                         |
| P65          | 0                      | 0                     | 1                         |
| P66          | 0                      | 0                     | 1                         |
| P67          | 0                      | 0                     | 2                         |
| P68          | 0                      | 0                     | 1                         |
| P69          | 0                      | 0                     | 1                         |
| P70          | 0                      | 0                     | 1                         |
| P71          | 0                      | 0                     | 1                         |
| P72          | 0                      | 0                     | 1                         |
| P73          | 0                      | 0                     | 1                         |
| P74          | 0                      | 0                     | 1                         |
| P75          | 1                      | 0                     | 1                         |
| P76          | 0                      | 0                     | 1                         |
| <b>Total</b> | <b>1</b>               | <b>1</b>              | <b>30</b>                 |
