# Supplementary material
Source: PubMed Central journal article supplement (PMC1458925)
Supplement: pnas_0509685103_5.pdf [file pnas_0509685103_5.pdf]

**Table 5. *H. cydno galanthus*, *H. pachinus*, and hybrid male courtships of *H. cydno galanthus* and *H. pachinus* females**

| Males                     | No. of courtships to: |                        | Total no. of courtships | Preference index | Arcsine transform (angular equivalent) |
|---------------------------|-----------------------|------------------------|-------------------------|------------------|----------------------------------------|
|                           | <i>cydno</i> female   | <i>pachinus</i> female |                         |                  |                                        |
| <i>H. cydno galanthus</i> |                       |                        |                         |                  |                                        |
| G113                      | 15                    | 4                      | 19                      | 0.789            | 61.923                                 |
| G114                      | 14                    | 5                      | 19                      | 0.737            | 58.555                                 |
| G115                      | 10                    | 2                      | 12                      | 0.833            | 64.431                                 |
| G116                      | 7                     | 1                      | 8                       | 0.875            | 66.646                                 |
| G117                      | 20                    | 1                      | 21                      | 0.952            | 75.438                                 |
| G118                      | 14                    | 4                      | 18                      | 0.778            | 61.116                                 |
| G119                      | 21                    | 2                      | 23                      | 0.913            | 71.565                                 |
| G120                      | 18                    | 3                      | 21                      | 0.857            | 66.801                                 |
| G121                      | 16                    | 3                      | 19                      | 0.842            | 65.582                                 |
| G122                      | 9                     | 3                      | 12                      | 0.750            | 59.036                                 |
| G123                      | 13                    | 2                      | 15                      | 0.867            | 67.150                                 |
| G124                      | 19                    | 7                      | 26                      | 0.731            | 58.327                                 |
| G125                      | 8                     | 5                      | 13                      | 0.615            | 51.301                                 |
| G126                      | 10                    | 2                      | 12                      | 0.833            | 64.431                                 |
| G127                      | 11                    | 1                      | 12                      | 0.917            | 70.829                                 |
| G128                      | 1                     | 0                      | 1                       | 1.000            | 62.425                                 |
| G129                      | 2                     | 0                      | 2                       | 1.000            | 68.329                                 |
| G130                      | 1                     | 0                      | 1                       | 1.000            | 62.425                                 |
| G131                      | 6                     | 2                      | 8                       | 0.750            | 58.601                                 |
| G132                      | 7                     | 4                      | 11                      | 0.636            | 52.396                                 |
| G133                      | 12                    | 6                      | 18                      | 0.667            | 54.332                                 |
| G134                      | 9                     | 3                      | 12                      | 0.750            | 59.036                                 |
| G135                      | 3                     | 0                      | 3                       | 1.000            | 71.565                                 |
| G136                      | 13                    | 0                      | 13                      | 1.000            | 80.494                                 |
| G137                      | 14                    | 2                      | 16                      | 0.875            | 67.880                                 |
| G138                      | 8                     | 1                      | 9                       | 0.889            | 67.943                                 |
| G139                      | 14                    | 3                      | 17                      | 0.824            | 64.148                                 |
| G140                      | 8                     | 5                      | 13                      | 0.615            | 51.301                                 |

| Males                           | No. of courtships to: |                        | Total no. of courtships | Preference index | Arcsine transform (angular equivalent) |
|---------------------------------|-----------------------|------------------------|-------------------------|------------------|----------------------------------------|
|                                 | <i>cydno</i> female   | <i>pachinus</i> female |                         |                  |                                        |
| G141                            | 13                    | 4                      | 17                      | 0.765            | 60.234                                 |
| G142                            | 3                     | 0                      | 3                       | 1.000            | 71.565                                 |
| G143                            | 27                    | 4                      | 31                      | 0.871            | 68.210                                 |
| G144                            | 16                    | 2                      | 18                      | 0.889            | 69.151                                 |
| G145                            | 6                     | 0                      | 6                       | 1.000            | 76.367                                 |
| G146                            | 11                    | 0                      | 11                      | 1.000            | 79.709                                 |
| G147                            | 11                    | 2                      | 13                      | 0.846            | 65.443                                 |
| G148                            | 14                    | 1                      | 15                      | 0.933            | 72.814                                 |
| G149                            | 6                     | 0                      | 6                       | 1.000            | 76.367                                 |
| G150                            | 10                    | 2                      | 12                      | 0.833            | 64.431                                 |
| G151                            | 12                    | 3                      | 15                      | 0.800            | 62.425                                 |
| G152                            | 13                    | 2                      | 15                      | 0.867            | 67.150                                 |
| G153                            | 12                    | 2                      | 14                      | 0.857            | 66.343                                 |
| G154                            | 12                    | 3                      | 15                      | 0.800            | 62.425                                 |
| G155                            | 12                    | 5                      | 17                      | 0.706            | 56.613                                 |
| G156                            | 11                    | 2                      | 13                      | 0.846            | 65.443                                 |
| G157                            | 18                    | 1                      | 19                      | 0.947            | 74.701                                 |
| <b><i>H. pachinus</i> males</b> |                       |                        |                         |                  |                                        |
| P78                             | 0                     | 2                      | 2                       | 0.000            | 21.671                                 |
| P79                             | 1                     | 15                     | 16                      | 0.063            | 16.649                                 |
| P80                             | 4                     | 9                      | 13                      | 0.308            | 34.338                                 |
| P81                             | 1                     | 11                     | 12                      | 0.083            | 19.171                                 |
| P82                             | 2                     | 9                      | 11                      | 0.182            | 26.717                                 |
| P83                             | 1                     | 10                     | 11                      | 0.091            | 20.004                                 |
| P84                             | 4                     | 18                     | 22                      | 0.182            | 26.010                                 |
| P85                             | 2                     | 16                     | 18                      | 0.111            | 20.849                                 |
| P86                             | 0                     | 1                      | 1                       | 0.000            | 27.575                                 |
| P87                             | 2                     | 10                     | 12                      | 0.167            | 25.569                                 |
| P88                             | 3                     | 9                      | 12                      | 0.250            | 30.964                                 |
| P89                             | 1                     | 17                     | 18                      | 0.056            | 15.712                                 |
| P90                             | 1                     | 12                     | 13                      | 0.077            | 18.435                                 |
| P91                             | 3                     | 11                     | 14                      | 0.214            | 28.577                                 |
| P92                             | 2                     | 10                     | 12                      | 0.167            | 25.569                                 |

| Males                                                                        | No. of courtships to: |                        | Total no. of courtships | Preference index | Arcsine transform (angular equivalent) |
|------------------------------------------------------------------------------|-----------------------|------------------------|-------------------------|------------------|----------------------------------------|
|                                                                              | <i>cydno</i> female   | <i>pachinus</i> female |                         |                  |                                        |
| P93                                                                          | 2                     | 9                      | 11                      | 0.182            | 26.717                                 |
| P94                                                                          | 2                     | 13                     | 15                      | 0.133            | 22.850                                 |
| P95                                                                          | 1                     | 15                     | 16                      | 0.063            | 16.649                                 |
| P96                                                                          | 0                     | 1                      | 1                       | 0.000            | 27.575                                 |
| P97                                                                          | 0                     | 21                     | 21                      | 0.000            | 7.545                                  |
| P98                                                                          | 2                     | 11                     | 13                      | 0.154            | 24.557                                 |
| P99                                                                          | 3                     | 10                     | 13                      | 0.231            | 29.698                                 |
| P100                                                                         | 0                     | 2                      | 2                       | 0.000            | 21.671                                 |
| P101                                                                         | 4                     | 17                     | 21                      | 0.190            | 26.647                                 |
| P102                                                                         | 2                     | 10                     | 12                      | 0.167            | 25.569                                 |
| P103                                                                         | 0                     | 9                      | 9                       | 0.000            | 11.310                                 |
| P104                                                                         | 0                     | 12                     | 12                      | 0.000            | 9.875                                  |
| P105                                                                         | 0                     | 14                     | 14                      | 0.000            | 9.175                                  |
| P106                                                                         | 2                     | 18                     | 20                      | 0.100            | 19.774                                 |
| P107                                                                         | 2                     | 22                     | 24                      | 0.083            | 18.046                                 |
| P108                                                                         | 2                     | 6                      | 8                       | 0.250            | 31.399                                 |
| P109                                                                         | 0                     | 8                      | 8                       | 0.000            | 11.948                                 |
| P110                                                                         | 0                     | 12                     | 12                      | 0.000            | 9.875                                  |
| P111                                                                         | 0                     | 6                      | 6                       | 0.000            | 13.633                                 |
| P112                                                                         | 2                     | 13                     | 15                      | 0.133            | 22.850                                 |
| <b>F<sub>1</sub> males: <i>H. pachinus</i> female × <i>H. cydno</i> male</b> |                       |                        |                         |                  |                                        |
| A1                                                                           | 11                    | 11                     | 22                      | 0.500            | 45.000                                 |
| A3                                                                           | 3                     | 7                      | 10                      | 0.300            | 34.078                                 |
| A4                                                                           | 11                    | 5                      | 16                      | 0.688            | 55.495                                 |
| A6                                                                           | 12                    | 9                      | 21                      | 0.571            | 48.964                                 |
| A7                                                                           | 4                     | 6                      | 10                      | 0.400            | 39.639                                 |
| A11                                                                          | 10                    | 11                     | 21                      | 0.476            | 43.682                                 |
| A14                                                                          | 7                     | 2                      | 9                       | 0.778            | 60.426                                 |
| A15                                                                          | 17                    | 19                     | 36                      | 0.472            | 43.440                                 |
| A16                                                                          | 2                     | 2                      | 4                       | 0.500            | 45.000                                 |
| A17                                                                          | 12                    | 9                      | 21                      | 0.571            | 48.964                                 |
| A19                                                                          | 8                     | 10                     | 18                      | 0.444            | 41.938                                 |
| A24                                                                          | 13                    | 6                      | 19                      | 0.684            | 55.379                                 |

| Males                                                                                                                                       | No. of courtships to: |                        | Total no. of courtships | Preference index | Arcsine transform (angular equivalent) |
|---------------------------------------------------------------------------------------------------------------------------------------------|-----------------------|------------------------|-------------------------|------------------|----------------------------------------|
|                                                                                                                                             | <i>cydno</i> female   | <i>pachinus</i> female |                         |                  |                                        |
| A32                                                                                                                                         | 9                     | 10                     | 19                      | 0.474            | 43.549                                 |
| A34                                                                                                                                         | 8                     | 14                     | 22                      | 0.364            | 37.354                                 |
| A35                                                                                                                                         | 9                     | 13                     | 22                      | 0.409            | 39.937                                 |
| A36                                                                                                                                         | 9                     | 10                     | 19                      | 0.474            | 43.549                                 |
| A38                                                                                                                                         | 4                     | 4                      | 8                       | 0.500            | 45.000                                 |
| <b>Reverse F<sub>1</sub> males: <i>H. cydno</i> female × <i>H. pachinus</i> male</b>                                                        |                       |                        |                         |                  |                                        |
| C1                                                                                                                                          | 8                     | 12                     | 20                      | 0.400            | 39.443                                 |
| C5                                                                                                                                          | 6                     | 14                     | 20                      | 0.300            | 33.661                                 |
| C6                                                                                                                                          | 2                     | 8                      | 10                      | 0.200            | 28.036                                 |
| C7                                                                                                                                          | 3                     | 8                      | 11                      | 0.273            | 32.408                                 |
| C9                                                                                                                                          | 4                     | 12                     | 16                      | 0.250            | 30.735                                 |
| C10                                                                                                                                         | 5                     | 10                     | 15                      | 0.333            | 35.745                                 |
| C12                                                                                                                                         | 4                     | 12                     | 16                      | 0.250            | 30.735                                 |
| C13                                                                                                                                         | 3                     | 7                      | 10                      | 0.300            | 34.078                                 |
| C14                                                                                                                                         | 15                    | 12                     | 27                      | 0.556            | 48.103                                 |
| C15                                                                                                                                         | 9                     | 21                     | 30                      | 0.300            | 33.515                                 |
| C17                                                                                                                                         | 21                    | 35                     | 56                      | 0.375            | 37.859                                 |
| C20                                                                                                                                         | 7                     | 2                      | 9                       | 0.778            | 60.426                                 |
| <b>F<sub>2</sub>: produced by interbreeding offspring from first F<sub>1</sub> cross (<i>H. pachinus</i> female × <i>H. cydno</i> male)</b> |                       |                        |                         |                  |                                        |
| B2                                                                                                                                          | 14                    | 11                     | 25                      | 0.560            | 48.345                                 |
| B3                                                                                                                                          | 10                    | 8                      | 18                      | 0.556            | 48.062                                 |
| B7                                                                                                                                          | 1                     | 3                      | 4                       | 0.250            | 32.549                                 |
| B8                                                                                                                                          | 2                     | 0                      | 2                       | 1.000            | 68.329                                 |
| B9                                                                                                                                          | 9                     | 10                     | 19                      | 0.474            | 43.549                                 |
| B10                                                                                                                                         | 4                     | 7                      | 11                      | 0.364            | 37.604                                 |
| B11                                                                                                                                         | 2                     | 1                      | 3                       | 0.667            | 52.733                                 |
| B14                                                                                                                                         | 1                     | 5                      | 6                       | 0.167            | 26.829                                 |
| B19                                                                                                                                         | 3                     | 8                      | 11                      | 0.273            | 32.408                                 |
| B21                                                                                                                                         | 2                     | 1                      | 3                       | 0.667            | 52.733                                 |
| B22                                                                                                                                         | 3                     | 9                      | 12                      | 0.250            | 30.964                                 |
| B24                                                                                                                                         | 5                     | 5                      | 10                      | 0.500            | 45.000                                 |
| B26                                                                                                                                         | 2                     | 9                      | 11                      | 0.182            | 26.717                                 |
| B32                                                                                                                                         | 8                     | 18                     | 26                      | 0.308            | 34.024                                 |

| Males                                                                                                                                             | No. of courtships to: |                        | Total no. of courtships | Preference index | Arcsine transform (angular equivalent) |
|---------------------------------------------------------------------------------------------------------------------------------------------------|-----------------------|------------------------|-------------------------|------------------|----------------------------------------|
|                                                                                                                                                   | <i>cydno</i> female   | <i>pachinus</i> female |                         |                  |                                        |
| B33                                                                                                                                               | 15                    | 4                      | 19                      | 0.789            | 61.923                                 |
| B34                                                                                                                                               | 4                     | 2                      | 6                       | 0.667            | 53.618                                 |
| B36                                                                                                                                               | 6                     | 1                      | 7                       | 0.857            | 65.089                                 |
| B37                                                                                                                                               | 7                     | 0                      | 7                       | 1.000            | 77.293                                 |
| B43                                                                                                                                               | 14                    | 5                      | 19                      | 0.737            | 58.555                                 |
| B44                                                                                                                                               | 8                     | 1                      | 9                       | 0.889            | 67.943                                 |
| B46                                                                                                                                               | 9                     | 5                      | 14                      | 0.643            | 52.867                                 |
| B49                                                                                                                                               | 22                    | 4                      | 26                      | 0.846            | 66.146                                 |
| B50                                                                                                                                               | 3                     | 2                      | 5                       | 0.600            | 50.008                                 |
| B51                                                                                                                                               | 10                    | 35                     | 45                      | 0.222            | 28.438                                 |
| B55                                                                                                                                               | 7                     | 5                      | 12                      | 0.583            | 49.512                                 |
| B56                                                                                                                                               | 25                    | 3                      | 28                      | 0.893            | 69.963                                 |
| B62                                                                                                                                               | 0                     | 2                      | 2                       | 0.000            | 21.671                                 |
| B64                                                                                                                                               | 9                     | 9                      | 18                      | 0.500            | 45.000                                 |
| B65                                                                                                                                               | 1                     | 2                      | 3                       | 0.333            | 37.267                                 |
| <b><i>H. cydno</i> backcross: female from first F<sub>1</sub> cross (<i>H. pachinus</i> female × <i>H. cydno</i> male) × <i>H. cydno</i> male</b> |                       |                        |                         |                  |                                        |
| D3                                                                                                                                                | 12                    | 5                      | 17                      | 0.706            | 56.613                                 |
| D4                                                                                                                                                | 4                     | 0                      | 4                       | 1.000            | 73.682                                 |
| D7                                                                                                                                                | 7                     | 2                      | 9                       | 0.778            | 60.426                                 |
| D9                                                                                                                                                | 12                    | 4                      | 16                      | 0.750            | 59.265                                 |
| D10                                                                                                                                               | 14                    | 5                      | 19                      | 0.737            | 58.555                                 |
| D16                                                                                                                                               | 22                    | 2                      | 24                      | 0.917            | 71.954                                 |
| D17                                                                                                                                               | 19                    | 10                     | 29                      | 0.655            | 53.805                                 |
| D18                                                                                                                                               | 36                    | 4                      | 40                      | 0.900            | 70.873                                 |
| D19                                                                                                                                               | 14                    | 1                      | 15                      | 0.933            | 72.814                                 |
| D21                                                                                                                                               | 39                    | 5                      | 44                      | 0.886            | 69.722                                 |
| D23                                                                                                                                               | 27                    | 4                      | 31                      | 0.871            | 68.210                                 |
