# Supplementary material
Source: PubMed Central journal article supplement (PMC1458925)
Supplement: pnas_0509685103_6.pdf [file pnas_0509685103_6.pdf]

**Table 6. White and yellow *H. cydno alithea* male courtships of white and yellow *H. cydno alithea* females**

| <b>Males</b>        | <b>No. of courtships to:</b> |                      |
|---------------------|------------------------------|----------------------|
|                     | <b>White female</b>          | <b>Yellow female</b> |
| <b>White males</b>  |                              |                      |
| W1                  | 1                            | 2                    |
| W2                  | 1                            | 1                    |
| W3                  | 6                            | 4                    |
| W4                  | 2                            | 1                    |
| W5                  | 1                            | 1                    |
| W6                  | 5                            | 3                    |
| W7                  | 0                            | 4                    |
| W8                  | 1                            | 3                    |
| W9                  | 2                            | 2                    |
| <b>Total</b>        | <b>19</b>                    | <b>21</b>            |
| <b>Yellow males</b> |                              |                      |
| Y1                  | 1                            | 1                    |
| Y2                  | 2                            | 2                    |
| Y3                  | 4                            | 2                    |
| Y4                  | 2                            | 1                    |
| Y5                  | 0                            | 4                    |
| Y6                  | 3                            | 9                    |
| Y7                  | 2                            | 7                    |
| Y8                  | 7                            | 6                    |
| Y9                  | 3                            | 1                    |
| Y10                 | 2                            | 7                    |
| Y11                 | 1                            | 8                    |
| Y12                 | 0                            | 9                    |
| Y13                 | 6                            | 7                    |
| Y14                 | 1                            | 0                    |
| <b>Total</b>        | <b>34</b>                    | <b>64</b>            |
